# Supplementary material for: Virally Suppressed People Living with HIV Who Use Opioids Have Diminished Latency Reversal
Source: MDPI journal article supplement (doi:10.3390/v15020415), 2023-02-01
Supplement: s1 [file s1]

Supplementary Table S1: Descriptive characteristics of study participants without ART treatment (IMPACT cohort)

|                                                   | Current Opioid users<br>N = 15 | Current Opioid non-users<br>N = 20 |
|---------------------------------------------------|--------------------------------|------------------------------------|
| Gender                                            |                                |                                    |
| Male (n, %)                                       | 7 (46.7%)                      | 13 (65%)                           |
| Female (n, %)                                     | 8 (53.3%)                      | 7 (35%)                            |
| Education                                         |                                |                                    |
| >9 grades (n, %)                                  | 12 (80%)                       | 18 (90%)                           |
| CD4 cell count                                    |                                |                                    |
| Mean (sd)                                         | 589.9 (323.7)                  | 596.9 (327.1)                      |
| Median (IQR)                                      | 559 (386)                      | 584 (474)                          |
| HIV viral load at blood draw<br>(total copies/ml) |                                |                                    |
| Median (IQR)                                      | 20500 (63896)                  | 102369 (84869)                     |
| Time since first HIV diagnosis                    |                                |                                    |
| Mean (sd)                                         | 5.4 (3.2)                      | 6.1 (3.5)                          |
| Median (IQR)                                      | 4.8 (5.9)                      | 4.8 (6.5)                          |
| <b>Current ART</b>                                |                                |                                    |
| Yes (n, %)                                        | 0 (0%)                         | 0 (0%)                             |
| No (n, %)                                         | 15 (100%)                      | 20 (100%)                          |
| <b>Opioid use at the time of enrollment (n,%)</b> | 15 (100%)                      | 0 (0%)                             |
| <b>Other substance use (n, %)</b>                 |                                |                                    |
| Risky alcohol drinking (NIAA criteria)            |                                |                                    |
| n, %                                              | 9 (60%)                        | 8 (40%)                            |
| Tobacco (n, %)                                    | 15 (100%)                      | 16 (80%)                           |
| Current Cannabis, past 30 days                    |                                |                                    |
| n, %                                              | 6 (40%)                        | 2 (10%)                            |
